# Supplementary material for: Acetylation of histone H3K27 signals the transcriptional elongation for estrogen receptor alpha
Source: PubMed Central journal article supplement (PMC7138820; doi:10.1038/s42003-020-0898-0), 2020-04-07
Supplement: 42003_2020_898_MOESM1_ESM.pdf [file 42003_2020_898_MOESM1_ESM.pdf]

## **Description of Additional Supplementary Items**

**File name:** Supplementary Data 1

**Description:** This file contains all source data of gel and blot figures presented in the main and supplementary figures.

**File name:** Supplementary Data 2

**Description:** This file contains all source data underlying the gene expression results and the exact p values in Excel format. This includes results shown in Fig. 1d, Fig. 1e, and Fig. S1.

**File name:** Supplementary Data 3

**Description:** This file contains all source data underlying the ChIP-qPCR results in Excel format. This includes results shown in Fig. 2a, Fig. 5e, and Fig. 6d.

**File name:** Supplementary Data 4

**Description:** This file contains all source data underlying the cell growth results in Excel format. This includes results shown in Fig. 6b, Fig. 6c, Fig. S5b and Fig. S5c.
