# Supplementary material for: Acetylation of histone H3K27 signals the transcriptional elongation for estrogen receptor alpha
Source: PubMed Central journal article supplement (PMC7138820; doi:10.1038/s42003-020-0898-0), 2020-04-07
Supplement: 42003_2020_898_MOESM7_ESM.pdf [file 42003_2020_898_MOESM7_ESM.pdf]

## Reporting Summary

Nature Research wishes to improve the reproducibility of the work that we publish. This form provides structure for consistency and transparency in reporting. For further information on Nature Research policies, see [Authors & Referees](#) and the [Editorial Policy Checklist](#).

### Statistics

For all statistical analyses, confirm that the following items are present in the figure legend, table legend, main text, or Methods section.

n/a Confirmed

- The exact sample size ( $n$ ) for each experimental group/condition, given as a discrete number and unit of measurement
- A statement on whether measurements were taken from distinct samples or whether the same sample was measured repeatedly
- The statistical test(s) used AND whether they are one- or two-sided  
*Only common tests should be described solely by name; describe more complex techniques in the Methods section.*
- A description of all covariates tested
- A description of any assumptions or corrections, such as tests of normality and adjustment for multiple comparisons
- A full description of the statistical parameters including central tendency (e.g. means) or other basic estimates (e.g. regression coefficient) AND variation (e.g. standard deviation) or associated estimates of uncertainty (e.g. confidence intervals)
- For null hypothesis testing, the test statistic (e.g.  $F$ ,  $t$ ,  $r$ ) with confidence intervals, effect sizes, degrees of freedom and  $P$  value noted  
*Give  $P$  values as exact values whenever suitable.*
- For Bayesian analysis, information on the choice of priors and Markov chain Monte Carlo settings
- For hierarchical and complex designs, identification of the appropriate level for tests and full reporting of outcomes
- Estimates of effect sizes (e.g. Cohen's  $d$ , Pearson's  $r$ ), indicating how they were calculated

*Our web collection on [statistics for biologists](#) contains articles on many of the points above.*

### Software and code

Policy information about [availability of computer code](#)

Data collection

UCSC genome cancer browser, cBioPortal for Cancer Genomics

Data analysis

MACS, Cistrome analysis pipeline, GREAT (Genomic Region Enrichment Annotation Tool), DAVID bioinformatics resources, ProbeFinder, Multalin, XDS software package, Phenix.autosol, Coot, Phenix.refine

For manuscripts utilizing custom algorithms or software that are central to the research but not yet described in published literature, software must be made available to editors/reviewers. We strongly encourage code deposition in a community repository (e.g. GitHub). See the Nature Research [guidelines for submitting code & software](#) for further information.

### Data

Policy information about [availability of data](#)

All manuscripts must include a [data availability statement](#). This statement should provide the following information, where applicable:

- Accession codes, unique identifiers, or web links for publicly available datasets
- A list of figures that have associated raw data
- A description of any restrictions on data availability

The ChIP-seq data presented in Figure 4 and 5 are available at NCBI's gene expression omnibus (GEO, accession number XXXX, will be updated before publication). The protein structure data presented in Figure 3f is available in PDB protein data bank with Accession number XXX (will be updated before publication). All other relevant data generated or analyzed in this study are included in this article and the supplementary information.

## Field-specific reporting

Please select the one below that is the best fit for your research. If you are not sure, read the appropriate sections before making your selection.

Life sciences       Behavioural & social sciences       Ecological, evolutionary & environmental sciences

For a reference copy of the document with all sections, see [nature.com/documents/nr-reporting-summary-flat.pdf](https://www.nature.com/documents/nr-reporting-summary-flat.pdf)

## Life sciences study design

All studies must disclose on these points even when the disclosure is negative.

|                 |                                                                                                                                                                                             |
|-----------------|---------------------------------------------------------------------------------------------------------------------------------------------------------------------------------------------|
| Sample size     | Sufficient sample sizes were chosen for each experiment to determine whether the outcome was statistically significant.                                                                     |
| Data exclusions | No data were excluded.                                                                                                                                                                      |
| Replication     | Cell growth samples were at least triplicated. CHIP-qPCR experiments were duplicated and repeated for at least two times. RT-qPCR experiments were duplicated and repeated for three times. |
| Randomization   | Randomization was not applicable in this study.                                                                                                                                             |
| Blinding        | Blinding was not applicable in this study.                                                                                                                                                  |

## Reporting for specific materials, systems and methods

We require information from authors about some types of materials, experimental systems and methods used in many studies. Here, indicate whether each material, system or method listed is relevant to your study. If you are not sure if a list item applies to your research, read the appropriate section before selecting a response.

### Materials & experimental systems

| n/a                                 | Included in the study                                     |
|-------------------------------------|-----------------------------------------------------------|
| <input type="checkbox"/>            | <input checked="" type="checkbox"/> Antibodies            |
| <input type="checkbox"/>            | <input checked="" type="checkbox"/> Eukaryotic cell lines |
| <input checked="" type="checkbox"/> | <input type="checkbox"/> Palaeontology                    |
| <input checked="" type="checkbox"/> | <input type="checkbox"/> Animals and other organisms      |
| <input checked="" type="checkbox"/> | <input type="checkbox"/> Human research participants      |
| <input checked="" type="checkbox"/> | <input type="checkbox"/> Clinical data                    |

### Methods

| n/a                                 | Included in the study                           |
|-------------------------------------|-------------------------------------------------|
| <input type="checkbox"/>            | <input checked="" type="checkbox"/> ChIP-seq    |
| <input checked="" type="checkbox"/> | <input type="checkbox"/> Flow cytometry         |
| <input checked="" type="checkbox"/> | <input type="checkbox"/> MRI-based neuroimaging |

## Antibodies

|                 |                                                                                                                                                                                                                                                                                                                                                                                                                                                                                                                                                                                                                                                                                                                                                                        |
|-----------------|------------------------------------------------------------------------------------------------------------------------------------------------------------------------------------------------------------------------------------------------------------------------------------------------------------------------------------------------------------------------------------------------------------------------------------------------------------------------------------------------------------------------------------------------------------------------------------------------------------------------------------------------------------------------------------------------------------------------------------------------------------------------|
| Antibodies used | For Western blot: anti-TFAP2C (Santa Cruz, sc-53162, 1:1000), anti-HA antibody (Sigma/Roche, 11867423001, 1:1000), anti-AFF4 (Bethyl Labs, A302-538A, 1:1000), anti- $\beta$ -actin (Sigma, A2228, 1:2500), anti-ER $\alpha$ (Abcam, ab108398, 1:1000), anti-AFF1 (Bethyl Labs, A302-345A, 1:1000), anti-AF9 (Bethyl Labs, A300-597A, 1:1000), anti-ENL (Bethyl Labs, A302-267A, 1:1000), anti-Flag (Sigma, A8592, 1:1000), and anti-GFP (Santa Cruz Biotechnology, sc-9996, 1:1000).<br>For ChIP-qPCR: rabbit IgG (Santa Cruz Biotechnology, sc-2027), mouse IgG (Santa Cruz Biotechnology, sc-2025), anti-H3K27ac (Abcam, ab4729), anti-AFF4 (Bethyl Labs, A302-538A), anti-RNA polymerase II (Abcam, ab817), and anti-Cylin T1 (Santa Cruz Biotechnology, sc-8127). |
| Validation      | All antibodies were validated by the manufacturers with multiple publications referred.                                                                                                                                                                                                                                                                                                                                                                                                                                                                                                                                                                                                                                                                                |

## Eukaryotic cell lines

Policy information about [cell lines](#)

|                                                                      |                                                                                       |
|----------------------------------------------------------------------|---------------------------------------------------------------------------------------|
| Cell line source(s)                                                  | All cell lines were initially purchased from ATCC.                                    |
| Authentication                                                       | All cell lines were authenticated using morphology and STR profiling.                 |
| Mycoplasma contamination                                             | All cell lines were tested negative for mycoplasma contamination by PCR-based method. |
| Commonly misidentified lines<br>(See <a href="#">ICLAC</a> register) | None                                                                                  |

## Data deposition

- Confirm that both raw and final processed data have been deposited in a public database such as [GEO](#).
- Confirm that you have deposited or provided access to graph files (e.g. BED files) for the called peaks.

### Data access links

*May remain private before publication.*

As this is the initial submission, the data deposition is pending and the data access links will be provided during revision.

### Files in database submission

The ChIP-seq raw data will be deposited as fastq files, and the processed files will be deposited as bigwig files.

### Genome browser session

(e.g. [UCSC](#))

This will be provided when submitting a revised manuscript.

## Methodology

### Replicates

Because we performed the ChIP-seq in Active Motif Inc, the samples have no replicates due to the high cost. But we performed pilot ChIP-seq to validate each antibody prior to the formal ChIP-seq experiment. We also sequenced Input sample as a background control. Additionally, the important peaks related to this study were all validated by ChIP-qPCR.

### Sequencing depth

The 75-nt sequence reads generated by Illumina sequencing (using NextSeq 500) are mapped to the genome using the BWA algorithm with default settings. ChIP-seq samples yielded 31-40million single-ended reads. Only reads that pass Illumina's purity filter, align with no more than 2 mismatches, and map uniquely to the genome are used in the subsequent analysis.

### Antibodies

anti-histone H3K27ac (Active Motif, 39133), anti-AFF4 (Bethyl Labs, A302-538A).

### Peak calling parameters

Peak calling was performed using MACS with the following settings: mfold 10-30, p value 10e-13

### Data quality

Compared to the default MASC setting for peak calling (which is mfold 10-30, p value 10e-5, we used a much more stringent criterion and therefore resulted in very robust peaks, with 90% of the peaks with higher than 5 fold enrichment over background.

### Software

MACS, Cistrome analysis pipeline, GREAT (Genomic Region Enrichment Annotation Tool), DAVID bioinformatics resources.
